# Supplementary material
Source: Research Square preprint supplement (doi:10.21203/rs.3.rs-9280273/v1)
Supplement: Supplementary file 1 [file 9b1419aec1aef796ea367a82.docx]

Data availability

All data presented in this study are displayed in the figures of this paper. The original datasets are available from the corresponding author upon reasonable request.
