# Supplementary material
Source: Research Square preprint supplement (doi:10.21203/rs.3.rs-9280273/v1)
Supplement: Supplementary file 2 [file cd1dae3e8f8ac98d1727b919.docx]

**Highlights**

> > This work proposes a dynamically tunable terahertz absorber based on a patterned single-layer graphene structure, achieving eight distinct narrowband absorption peaks within 1-10 THz, seven of which exhibit absorption rates exceeding 90%.

> > The absorber features a simple three-layer stack (Au/SiO2/graphene), significantly reducing fabrication complexity while enabling active tuning of absorption frequency and intensity via graphene’s Fermi level and relaxation time.

> > The highly symmetric design ensures polarization-insensitive performance and maintains stable absorption under incident angles up to 50°, making it suitable for practical terahertz applications.

> > The physical origins of the multimode resonances are systematically elucidated using impedance matching theory, multiple interference-reflection theory, and multipole decomposition, revealing a transition from edge-localized electric dipole resonances to hybrid electric-magnetic dipole modes.

> > The device demonstrates excellent sensing capabilities with a maximum refractive index sensitivity of 3000 GHz/RIU, a high average FOM of 18.1, and a peak Q-factor of 114.7, highlighting its potential for high-performance multi-channel terahertz sensing.
