# Supplementary material
Source: Research Square preprint supplement (doi:10.21203/rs.3.rs-9280273/v1)
Supplement: Supplementary file 4 [file e4a05b17a70ce5bad2b1ddf1.docx]

**Declaration of Interest Statement**

We declare that we have no financial and personal relationships with other people or organizations that can inappropriately influence our work, there is no professional or other personal interest of any nature or kind in any product, service and/or company that could be construed as influencing the position presented in, or the review of, the manuscript entitled, “**A Multimode Eight-Band Tunable Terahertz Absorber Based on Electric-Dipole-Dominated Resonances for Multi-Channel Sensing**”.
